# Supplementary material for: Comprehensive Analysis of Hepatitis B Virus Promoter Region Mutations
Source: MDPI journal article supplement (doi:10.3390/v10110603), 2018-11-01
Supplement: s1 [file s1]

**Supplementary Table S1.** Variant frequencies within the core promoter binding regions. Values reported to values 0.5%-99.5%; values between 5-95% are highlighted in green.

| <u>X promoter:</u> | 1101-1121 |                   |                       |
|--------------------|-----------|-------------------|-----------------------|
| Genotype           | Position  | Variant Frequency | Variant Nucleotide(s) |
| A                  | 1113      | 4.40%             | C                     |
| A                  | 1113      | 95.40%            | T                     |
| B                  | 1117      | 99.40%            | A                     |
| B                  | 1117      | 0.60%             | G                     |
| B                  | 1116      | 86.00%            | A                     |
| B                  | 1116      | 2.60%             | C                     |
| B                  | 1116      | 11.40%            | G                     |
| B                  | 1113      | 7.70%             | C                     |
| B                  | 1113      | 91.60%            | T                     |
| B                  | 1108      | 98.00%            | A                     |
| B                  | 1108      | 0.70%             | C                     |
| B                  | 1108      | 1.10%             | G                     |
| B                  | 1107      | 99.10%            | C                     |
| B                  | 1107      | 0.90%             | T                     |
| B                  | 1103      | 99.30%            | A                     |
| B                  | 1103      | 0.70%             | G                     |
| C                  | 1113      | 0.70%             | C                     |
| C                  | 1113      | 0.70%             | G                     |
| C                  | 1113      | 98.40%            | T                     |
| C                  | 1108      | 94.30%            | A                     |
| C                  | 1108      | 3.80%             | C                     |
| C                  | 1108      | 1.00%             | G                     |
| C                  | 1108      | 1.00%             | T                     |
| C                  | 1105      | 99.30%            | C                     |
| C                  | 1105      | 0.50%             | G                     |
| C                  | 1104      | 33.70%            | C                     |
| C                  | 1104      | 66.00%            | G                     |
| C                  | 1103      | 46.90%            | A                     |
| C                  | 1103      | 53.00%            | G                     |
| C                  | 1102      | 2.00%             | A                     |
| C                  | 1102      | 97.40%            | C                     |
| C                  | 1101      | 2.30%             | C                     |
| C                  | 1101      | 97.60%            | T                     |
| D                  | 1117      | 98.60%            | A                     |
| D                  | 1117      | 0.50%             | G                     |
| D                  | 1117      | 0.50%             | T                     |
| D                  | 1108      | 99.30%            | A                     |

|   |      |        |   |
|---|------|--------|---|
| D | 1108 | 0.50%  | C |
| D | 1101 | 0.60%  | C |
| D | 1101 | 99.30% | T |
| E | 1113 | 32.00% | C |
| E | 1113 | 67.60% | T |
| E | 1110 | 1.60%  | A |
| E | 1110 | 98.00% | G |
| E | 1108 | 88.00% | A |
| E | 1108 | 10.40% | C |
| E | 1108 | 1.60%  | G |
| E | 1104 | 1.60%  | A |
| E | 1104 | 98.40% | G |
| F | 1117 | 98.80% | A |
| F | 1117 | 0.80%  | G |
| F | 1108 | 98.80% | A |
| F | 1108 | 1.00%  | C |
| H | 1116 | 96.20% | A |
| H | 1116 | 3.80%  | C |
| H | 1108 | 96.20% | A |
| H | 1108 | 3.80%  | C |

NREBP: nts 1611-1619

| Genotype | Position | Variant Frequency | Variant Nucleotide(s) |
|----------|----------|-------------------|-----------------------|
| A        | 1613     | 4.90%             | A                     |
| A        | 1613     | 95.10%            | G                     |
| A        | 1612     | 90.20%            | A                     |
| A        | 1612     | 9.80%             | C                     |
| B        | 1617     | 99.40%            | A                     |
| B        | 1617     | 0.60%             | C                     |
| B        | 1613     | 19.70%            | A                     |
| B        | 1613     | 80.30%            | G                     |
| B        | 1612     | 98.90%            | A                     |
| B        | 1612     | 0.90%             | G                     |
| C        | 1613     | 22.70%            | A                     |
| C        | 1613     | 77.30%            | G                     |
| D        | 1613     | 7.30%             | A                     |
| D        | 1613     | 92.70%            | G                     |
| E        | 1618     | 98.80%            | C                     |
| E        | 1618     | 1.20%             | T                     |
| E        | 1613     | 5.70%             | A                     |

|   |      |        |   |
|---|------|--------|---|
| E | 1613 | 94.30% | G |
| F | 1613 | 2.00%  | A |
| F | 1613 | 98.00% | G |
| G | 1617 | 5.10%  | A |
| G | 1617 | 94.90% | G |
| G | 1613 | 97.40% | A |
| G | 1613 | 2.60%  | G |
| H | 1617 | 98.10% | A |
| H | 1617 | 1.90%  | C |

C/EBP-HNF4(1): nts 1644-1672

| Genotype | Maximum | Variant Frequency | Variant Nucleotide(s) |
|----------|---------|-------------------|-----------------------|
| A        | 1659    | 98.90%            | A                     |
| A        | 1659    | 1.00%             | C                     |
| A        | 1653    | 96.80%            | C                     |
| A        | 1653    | 3.20%             | T                     |
| B        | 1645    | 97.10%            | A                     |
| B        | 1645    | 2.70%             | C                     |
| C        | 1665    | 0.60%             | A                     |
| C        | 1665    | 99.40%            | C                     |
| C        | 1661    | 0.60%             | A                     |
| C        | 1661    | 99.40%            | G                     |
| C        | 1659    | 97.00%            | A                     |
| C        | 1659    | 2.90%             | C                     |
| C        | 1658    | 1.00%             | A                     |
| C        | 1658    | 98.70%            | G                     |
| C        | 1655    | 1.60%             | C                     |
| C        | 1655    | 98.30%            | T                     |
| C        | 1653    | 87.80%            | C                     |
| C        | 1653    | 12.20%            | T                     |
| C        | 1652    | 95.70%            | A                     |
| C        | 1652    | 4.30%             | G                     |
| C        | 1647    | 1.50%             | C                     |
| C        | 1647    | 98.50%            | G                     |
| D        | 1665    | 3.00%             | A                     |
| D        | 1665    | 97.00%            | C                     |
| D        | 1661    | 1.30%             | A                     |
| D        | 1661    | 98.70%            | G                     |
| D        | 1659    | 98.60%            | A                     |
| D        | 1659    | 1.40%             | C                     |

|   |      |        |   |
|---|------|--------|---|
| D | 1655 | 0.50%  | C |
| D | 1655 | 99.50% | T |
| D | 1653 | 90.90% | C |
| D | 1653 | 9.10%  | T |
| D | 1652 | 97.50% | A |
| D | 1652 | 2.50%  | G |
| D | 1647 | 1.90%  | A |
| D | 1647 | 98.10% | G |
| E | 1659 | 98.40% | A |
| E | 1659 | 1.60%  | C |
| E | 1653 | 93.50% | C |
| E | 1653 | 6.50%  | T |
| E | 1652 | 98.80% | A |
| E | 1652 | 0.80%  | G |
| E | 1649 | 98.80% | C |
| E | 1649 | 1.20%  | T |
| E | 1648 | 1.20%  | G |
| E | 1648 | 98.40% | T |
| F | 1665 | 16.10% | A |
| F | 1665 | 83.70% | C |
| F | 1659 | 56.30% | A |
| F | 1659 | 43.50% | C |
| F | 1658 | 12.10% | A |
| F | 1658 | 1.20%  | C |
| F | 1658 | 86.30% | G |
| F | 1655 | 1.60%  | C |
| F | 1655 | 98.20% | T |
| F | 1653 | 97.00% | C |
| F | 1653 | 3.00%  | T |
| F | 1648 | 5.20%  | C |
| F | 1648 | 94.80% | T |
| F | 1646 | 98.60% | A |
| F | 1646 | 1.20%  | G |
| F | 1645 | 1.20%  | A |
| F | 1645 | 98.00% | C |
| F | 1645 | 0.80%  | T |
| G | 1659 | 94.90% | A |
| G | 1659 | 2.60%  | C |
| G | 1659 | 2.60%  | T |
| G | 1653 | 5.10%  | C |
| G | 1653 | 94.90% | T |

|   |      |        |   |
|---|------|--------|---|
| G | 1652 | 94.90% | A |
| G | 1652 | 5.10%  | G |
| G | 1649 | 5.10%  | A |
| G | 1649 | 94.90% | G |
| G | 1648 | 94.90% | A |
| G | 1648 | 5.10%  | T |
| G | 1647 | 94.90% | C |
| G | 1647 | 5.10%  | G |
| G | 1645 | 33.30% | A |
| G | 1645 | 66.70% | G |
| H | 1670 | 96.20% | A |
| H | 1670 | 3.80%  | T |
| H | 1661 | 7.70%  | A |
| H | 1661 | 92.30% | G |
| H | 1658 | 3.80%  | A |
| H | 1658 | 96.20% | G |
| H | 1653 | 92.30% | C |
| H | 1653 | 7.70%  | T |
| H | 1652 | 96.20% | A |
| H | 1652 | 3.80%  | G |
| H | 1647 | 96.20% | A |
| H | 1647 | 3.80%  | C |

Site1: HNF3(1)-FTF: nts 1679-1700

| Genotype | Maximum | Variant Frequency | Variant Nucleotide(s) |
|----------|---------|-------------------|-----------------------|
| B        | 1688    | 4.20%             | A                     |
| B        | 1688    | 95.60%            | G                     |
| B        | 1687    | 95.70%            | C                     |
| B        | 1687    | 4.30%             | T                     |
| B        | 1683    | 1.00%             | C                     |
| B        | 1683    | 1.20%             | G                     |
| B        | 1683    | 97.80%            | T                     |
| B        | 1680    | 98.90%            | A                     |
| B        | 1680    | 0.90%             | C                     |
| B        | 1679    | 98.90%            | A                     |
| B        | 1679    | 0.90%             | G                     |
| C        | 1688    | 1.40%             | A                     |
| C        | 1688    | 98.60%            | G                     |
| C        | 1680    | 99.00%            | A                     |
| C        | 1680    | 0.90%             | C                     |

|   |      |        |   |
|---|------|--------|---|
| C | 1679 | 90.80% | A |
| C | 1679 | 1.30%  | C |
| C | 1679 | 7.70%  | G |
| D | 1694 | 98.00% | C |
| D | 1694 | 2.00%  | T |
| D | 1679 | 92.90% | A |
| D | 1679 | 1.90%  | C |
| D | 1679 | 5.10%  | G |
| E | 1693 | 98.80% | A |
| E | 1693 | 0.80%  | T |
| E | 1691 | 99.20% | C |
| E | 1691 | 0.80%  | G |
| F | 1700 | 98.80% | A |
| F | 1700 | 0.80%  | G |
| F | 1699 | 98.80% | A |
| F | 1699 | 1.20%  | C |
| F | 1697 | 97.20% | C |
| F | 1697 | 2.40%  | T |
| F | 1695 | 99.20% | A |
| F | 1695 | 0.80%  | C |
| F | 1694 | 0.80%  | C |
| F | 1694 | 99.20% | G |
| F | 1693 | 0.80%  | A |
| F | 1693 | 99.20% | G |
| F | 1692 | 0.80%  | C |
| F | 1692 | 0.80%  | G |
| F | 1692 | 98.20% | T |
| F | 1689 | 96.60% | A |
| F | 1689 | 3.40%  | C |
| F | 1688 | 33.70% | C |
| F | 1688 | 66.10% | G |
| F | 1687 | 1.20%  | C |
| F | 1687 | 98.40% | T |
| F | 1685 | 99.00% | A |
| F | 1685 | 0.80%  | C |
| F | 1684 | 99.00% | C |
| F | 1684 | 0.80%  | T |
| F | 1682 | 0.80%  | A |
| F | 1682 | 99.20% | G |
| F | 1681 | 99.00% | G |
| F | 1681 | 1.00%  | T |

|   |      |        |   |
|---|------|--------|---|
| F | 1680 | 45.00% | A |
| F | 1680 | 44.40% | C |
| F | 1680 | 4.00%  | G |
| F | 1680 | 6.70%  | T |
| F | 1679 | 98.60% | A |
| F | 1679 | 1.40%  | G |
| G | 1697 | 94.90% | G |
| G | 1697 | 5.10%  | T |
| G | 1695 | 10.30% | A |
| G | 1695 | 5.10%  | C |
| G | 1695 | 84.60% | G |
| G | 1694 | 5.10%  | C |
| G | 1694 | 94.90% | G |
| G | 1693 | 5.10%  | A |
| G | 1693 | 94.90% | G |
| G | 1688 | 94.90% | A |
| G | 1688 | 5.10%  | G |
| G | 1679 | 5.10%  | A |
| G | 1679 | 94.90% | T |
| H | 1681 | 3.80%  | A |
| H | 1681 | 96.20% | G |

Site 2: HNF3(2)-Sp1(1): nts 1713-1740

| Genotype | Position | Variant Frequency | Variant Nucleotide(s) |
|----------|----------|-------------------|-----------------------|
| A        | 1740     | 66.20%            | C                     |
| A        | 1740     | 33.80%            | T                     |
| A        | 1739     | 1.10%             | A                     |
| A        | 1739     | 98.80%            | G                     |
| A        | 1727     | 33.30%            | A                     |
| A        | 1727     | 66.70%            | G                     |
| A        | 1721     | 2.00%             | A                     |
| A        | 1721     | 98.00%            | G                     |
| A        | 1719     | 99.00%            | G                     |
| A        | 1719     | 0.70%             | T                     |
| A        | 1717     | 1.20%             | A                     |
| A        | 1717     | 98.60%            | G                     |
| B        | 1740     | 4.30%             | C                     |
| B        | 1740     | 95.30%            | T                     |
| B        | 1739     | 1.80%             | A                     |
| B        | 1739     | 98.20%            | G                     |

|   |      |        |   |
|---|------|--------|---|
| B | 1738 | 97.50% | A |
| B | 1738 | 2.50%  | T |
| B | 1730 | 0.60%  | A |
| B | 1730 | 98.90% | G |
| B | 1727 | 0.50%  | A |
| B | 1727 | 1.90%  | C |
| B | 1727 | 3.20%  | G |
| B | 1727 | 94.40% | T |
| B | 1726 | 38.50% | A |
| B | 1726 | 61.30% | C |
| B | 1725 | 98.70% | A |
| B | 1725 | 1.20%  | G |
| B | 1724 | 0.80%  | C |
| B | 1724 | 99.10% | T |
| B | 1721 | 1.80%  | A |
| B | 1721 | 98.20% | G |
| B | 1719 | 0.60%  | C |
| B | 1719 | 98.60% | G |
| B | 1719 | 0.70%  | T |
| C | 1740 | 1.00%  | C |
| C | 1740 | 98.90% | T |
| C | 1739 | 0.50%  | A |
| C | 1739 | 99.30% | G |
| C | 1730 | 0.70%  | A |
| C | 1730 | 99.30% | C |
| C | 1728 | 1.00%  | A |
| C | 1728 | 99.00% | G |
| C | 1727 | 57.60% | A |
| C | 1727 | 42.20% | G |
| C | 1726 | 99.00% | A |
| C | 1726 | 0.90%  | C |
| C | 1724 | 1.20%  | C |
| C | 1724 | 98.70% | T |
| C | 1721 | 22.80% | A |
| C | 1721 | 77.20% | G |
| C | 1719 | 45.60% | G |
| C | 1719 | 54.30% | T |
| D | 1740 | 0.60%  | C |
| D | 1740 | 99.40% | T |
| D | 1739 | 0.50%  | A |
| D | 1739 | 97.80% | G |



|   |      |        |   |
|---|------|--------|---|
| D | 1739 | 1.70%  | T |
| D | 1730 | 0.90%  | A |
| D | 1730 | 98.50% | C |
| D | 1728 | 1.10%  | A |
| D | 1728 | 98.90% | G |
| D | 1727 | 78.20% | A |
| D | 1727 | 21.70% | G |
| D | 1724 | 5.40%  | C |
| D | 1724 | 94.60% | T |
| D | 1719 | 2.40%  | C |
| D | 1719 | 0.50%  | G |
| D | 1719 | 97.00% | T |
| E | 1727 | 92.20% | A |
| E | 1727 | 7.80%  | G |
| E | 1719 | 1.20%  | G |
| E | 1719 | 98.80% | T |
| E | 1718 | 1.20%  | C |
| E | 1718 | 98.80% | T |
| F | 1740 | 66.10% | C |
| F | 1740 | 33.90% | T |
| F | 1727 | 21.00% | A |
| F | 1727 | 78.60% | G |
| F | 1726 | 98.60% | A |
| F | 1726 | 1.40%  | C |
| F | 1721 | 94.80% | A |
| F | 1721 | 5.20%  | G |
| G | 1739 | 94.90% | A |
| G | 1739 | 5.10%  | G |
| G | 1736 | 94.90% | A |
| G | 1736 | 5.10%  | G |
| G | 1730 | 5.10%  | C |
| G | 1730 | 94.90% | G |
| G | 1727 | 5.10%  | A |
| G | 1727 | 94.90% | T |
| G | 1726 | 5.10%  | A |
| G | 1726 | 94.90% | C |
| G | 1725 | 5.10%  | A |
| G | 1725 | 94.90% | G |
| G | 1721 | 2.60%  | A |
| G | 1721 | 5.10%  | G |
| G | 1721 | 92.30% | T |

|   |      |        |   |
|---|------|--------|---|
| H | 1721 | 88.50% | A |
| H | 1721 | 11.50% | G |

Sp1(2): nts 1743-1752

| Genotype | Position | Variant Frequency | Variant Nucleotide(s) |
|----------|----------|-------------------|-----------------------|
| B        | 1752     | 53.60%            | A                     |
| B        | 1752     | 2.40%             | C                     |
| B        | 1752     | 42.10%            | G                     |
| B        | 1752     | 1.80%             | T                     |
| B        | 1751     | 1.90%             | A                     |
| B        | 1751     | 97.70%            | G                     |
| B        | 1750     | 98.90%            | A                     |
| B        | 1750     | 0.90%             | T                     |
| B        | 1748     | 1.10%             | A                     |
| B        | 1748     | 98.80%            | G                     |
| B        | 1747     | 99.10%            | A                     |
| B        | 1747     | 0.60%             | C                     |
| C        | 1752     | 96.90%            | A                     |
| C        | 1752     | 2.50%             | T                     |
| D        | 1752     | 83.80%            | A                     |
| D        | 1752     | 13.10%            | C                     |
| D        | 1752     | 2.80%             | T                     |
| E        | 1752     | 95.50%            | A                     |
| E        | 1752     | 4.50%             | C                     |
| F        | 1745     | 98.60%            | G                     |
| F        | 1745     | 1.20%             | T                     |
| G        | 1752     | 5.10%             | A                     |
| G        | 1752     | 94.90%            | T                     |
| G        | 1748     | 5.10%             | G                     |
| G        | 1748     | 94.90%            | T                     |
| G        | 1746     | 94.90%            | A                     |
| G        | 1746     | 5.10%             | G                     |
| G        | 1745     | 94.90%            | C                     |
| G        | 1745     | 5.10%             | G                     |
| H        | 1752     | 11.50%            | C                     |
| H        | 1752     | 88.50%            | T                     |

TBP-LSF/HNF4(2)-TBP: nts 1758-1776

| Genotype | Position | Variant Frequency | Variant Nucleotide(s) |
|----------|----------|-------------------|-----------------------|
|----------|----------|-------------------|-----------------------|

|   |      |        |   |
|---|------|--------|---|
| A | 1773 | 1.60%  | C |
| A | 1773 | 98.40% | T |
| A | 1768 | 2.90%  | A |
| A | 1768 | 0.70%  | G |
| A | 1768 | 96.10% | T |
| A | 1766 | 93.30% | C |
| A | 1766 | 6.10%  | T |
| A | 1764 | 30.60% | A |
| A | 1764 | 69.10% | G |
| A | 1762 | 71.30% | A |
| A | 1762 | 28.50% | T |
| A | 1758 | 1.10%  | C |
| A | 1758 | 98.80% | T |
| B | 1775 | 96.40% | A |
| B | 1775 | 3.10%  | G |
| B | 1773 | 88.40% | C |
| B | 1773 | 11.60% | T |
| B | 1768 | 2.30%  | A |
| B | 1768 | 97.60% | T |
| B | 1766 | 97.60% | C |
| B | 1766 | 2.30%  | T |
| B | 1764 | 16.00% | A |
| B | 1764 | 84.00% | G |
| B | 1762 | 83.70% | A |
| B | 1762 | 16.20% | T |
| B | 1760 | 99.10% | A |
| B | 1760 | 0.80%  | G |
| C | 1775 | 79.40% | A |
| C | 1775 | 0.50%  | C |
| C | 1775 | 20.10% | G |
| C | 1773 | 97.90% | C |
| C | 1773 | 1.70%  | T |
| C | 1768 | 3.10%  | A |
| C | 1768 | 96.60% | T |
| C | 1766 | 94.80% | C |
| C | 1766 | 5.00%  | T |
| C | 1764 | 50.90% | A |
| C | 1764 | 48.90% | G |
| C | 1762 | 51.90% | A |
| C | 1762 | 47.90% | T |
| C | 1760 | 97.00% | A |

|   |      |        |   |
|---|------|--------|---|
| C | 1760 | 2.80%  | G |
| C | 1758 | 6.00%  | C |
| C | 1758 | 93.20% | T |
| D | 1775 | 98.00% | A |
| D | 1775 | 0.50%  | C |
| D | 1775 | 1.50%  | G |
| D | 1773 | 60.20% | C |
| D | 1773 | 39.70% | T |
| D | 1772 | 98.30% | A |
| D | 1772 | 0.60%  | G |
| D | 1772 | 0.60%  | T |
| D | 1768 | 2.60%  | A |
| D | 1768 | 97.20% | T |
| D | 1766 | 0.80%  | A |
| D | 1766 | 85.90% | C |
| D | 1766 | 9.70%  | G |
| D | 1766 | 3.50%  | T |
| D | 1765 | 0.60%  | G |
| D | 1765 | 99.10% | T |
| D | 1764 | 25.10% | A |
| D | 1764 | 0.70%  | C |
| D | 1764 | 66.80% | G |
| D | 1764 | 7.40%  | T |
| D | 1762 | 76.10% | A |
| D | 1762 | 23.30% | T |
| D | 1761 | 93.40% | A |
| D | 1761 | 6.10%  | C |
| D | 1758 | 1.20%  | C |
| D | 1758 | 98.80% | T |
| E | 1775 | 98.00% | A |
| E | 1775 | 1.60%  | C |
| E | 1773 | 98.80% | C |
| E | 1773 | 1.20%  | T |
| E | 1772 | 98.80% | A |
| E | 1772 | 0.80%  | C |
| E | 1769 | 0.80%  | A |
| E | 1769 | 99.20% | T |
| E | 1768 | 96.50% | C |
| E | 1768 | 3.10%  | G |
| E | 1764 | 12.20% | A |
| E | 1764 | 87.50% | G |

|   |      |        |   |
|---|------|--------|---|
| E | 1762 | 87.10% | A |
| E | 1762 | 0.80%  | C |
| E | 1762 | 11.80% | T |
| E | 1761 | 97.30% | A |
| E | 1761 | 2.40%  | C |
| E | 1760 | 99.20% | A |
| E | 1760 | 0.80%  | G |
| E | 1759 | 2.40%  | C |
| E | 1759 | 97.60% | T |
| F | 1773 | 0.60%  | A |
| F | 1773 | 42.50% | C |
| F | 1773 | 56.90% | T |
| F | 1768 | 3.60%  | A |
| F | 1768 | 96.40% | T |
| F | 1766 | 96.40% | C |
| F | 1766 | 3.60%  | T |
| F | 1765 | 0.80%  | C |
| F | 1765 | 99.20% | T |
| F | 1764 | 24.40% | A |
| F | 1764 | 75.60% | G |
| F | 1762 | 76.00% | A |
| F | 1762 | 24.00% | T |
| G | 1775 | 97.40% | A |
| G | 1775 | 2.60%  | G |
| G | 1773 | 5.10%  | C |
| G | 1773 | 94.90% | T |
| G | 1768 | 2.60%  | A |
| G | 1768 | 97.40% | T |
| G | 1765 | 92.30% | C |
| G | 1765 | 7.70%  | T |
| G | 1764 | 97.40% | A |
| G | 1764 | 2.60%  | G |
| G | 1762 | 2.60%  | A |
| G | 1762 | 97.40% | T |
| H | 1773 | 3.80%  | C |
| H | 1773 | 96.20% | T |
| H | 1768 | 3.80%  | A |
| H | 1768 | 96.20% | T |
| H | 1766 | 96.20% | C |
| H | 1766 | 3.80%  | T |
| H | 1764 | 3.80%  | A |

|   |      |        |   |
|---|------|--------|---|
| H | 1764 | 96.20% | G |
| H | 1762 | 92.30% | A |
| H | 1762 | 7.70%  | T |

TBP (3): nts 1788-1795

| Genotype | Position | Variant Frequency | Variant Nucleotide(s) |
|----------|----------|-------------------|-----------------------|
| A        | 1790     | 13.00%            | G                     |
| A        | 1790     | 86.80%            | T                     |
| G        | 1795     | 2.60%             | G                     |
| G        | 1795     | 97.40%            | T                     |
